# Supplementary material for: Implementing screening for social determinants of health using the Core 5 screening tool
Source: PubMed Central journal article supplement — BMJ Open Qual. 2021 Aug 10;10(3):e001362. doi: 10.1136/bmjoq-2021-001362 (PMC8356186; doi:10.1136/bmjoq-2021-001362), 2021-08-10
Supplement: bmjoq-2021-001362supp001.pdf [file bmjoq-2021-001362supp001.pdf]

## Appendix A

**Core Determinants of Health Screening Tool (the “Core 5”)****Pre-Surgical Patient Questionnaire***To help us care for you...*

It is important that we are all prepared for your upcoming surgery or procedure. In order to identify ways we may be able to help, please answer the questions below.

Please check yes or no for the questions below:

|                                                                                                                                            | Yes | No |
|--------------------------------------------------------------------------------------------------------------------------------------------|-----|----|
| 1. Has a lack of transportation kept you from work, attending medical appointments, or from getting things you need for your daily living? |     |    |
| 2. Are you currently having concerns at home with your utilities such as your heat, electric, natural gas, or water?                       |     |    |
| 3. Are you worried about losing your housing or are you homeless?                                                                          |     |    |
| 4. Do you or your family worry about whether your food will run out and you won't be able to get more?                                     |     |    |
| 5. Are you worried that someone may hurt you or your family?                                                                               |     |    |

*Thank you for taking the time to answer these questions. A social worker or nurse will contact you if you answered yes to any of the questions above.*

## Appendix B

### Staff Usability Survey of Core 5 SDOH Screening Tool

(Survey to administered via Survey Monkey following the six week implementation phase.)

1. *The Core 5 screening tool is clear and easy to understand.*  
Strongly Agree      Agree      Neutral Disagree      Strongly Disagree
  
2. *The Core 5 tool provides a good measure for evaluating the presence of social needs.*  
Strongly Agree      Agree      Neutral Disagree      Strongly Disagree
  
3. *The Core 5 tool was completed by patients in a reasonable amount of time.*  
Strongly Agree      Agree      Neutral Disagree      Strongly Disagree
  
4. *The process for staff referral to social work, based on patient identified needs on the Core 5 tool, is completed in a reasonable amount of time.*  
Strongly Agree      Agree      Neutral Disagree      Strongly Disagree
  
5. *The Core 5 tool can be easily incorporated into the pre-surgical visit.*  
Strongly Agree      Agree      Neutral Disagree      Strongly Disagree
  
6. *The Core 5 screening and referral process are vital components of pre-surgical consults.*  
Strongly Agree      Agree      Neutral Disagree      Strongly Disagree
  
7. *Patients seem comfortable answering the Core 5 questions.*  
Strongly Agree      Agree      Neutral Disagree      Strongly Disagree
  
8. *All patients were able to be included for screening and referral.*  
Strongly Agree      Agree      Neutral Disagree      Strongly Disagree

9. *I understand what social determinants of health are and how they may impact patient outcomes.*

Strongly Agree      Agree      Neutral Disagree      Strongly Disagree

10. *The Core 5 screening and referral process will improve patients' health.*

Strongly Agree      Agree      Neutral Disagree      Strongly Disagree

11. *The Core 5 screening process is important to patients achieving optimal health outcomes and abilities to meet their care goals.*

Strongly Agree      Agree      Neutral Disagree      Strongly Disagree

12. *The Core 5 screening process increased referrals of patients for unmet social needs.*

Strongly Agree      Agree      Neutral Disagree      Strongly Disagree

13. *The Core 5 screening tool should be continued after this pilot phase.*

Strongly Agree      Agree      Neutral Disagree      Strongly Disagree

14. *The Core 5 screening tool needs to be modified in order to improve patient referral processes.*

Strongly Agree      Agree      Neutral Disagree      Strongly Disagree

15. *The Core 5 screening process needs to be modified in order to improve staff usability.*

Strongly Agree      Agree      Neutral Disagree      Strongly Disagree
